1 **Title: Genome-wide association mapping within a single *Arabidopsis thaliana***  
2 **population reveals a richer genetic architecture for defensive metabolite diversity**

3

4 **Authors:** Andrew D. Gloss<sup>1,2</sup>, Amélie Vergnol<sup>2</sup>, Timothy C. Morton<sup>1</sup>, Peter J. Laurin<sup>1,2</sup>, Fabrice  
5 Roux<sup>3</sup>, Joy Bergelson<sup>1,2</sup>

6

7 **Affiliations:**

8 <sup>1</sup>Department of Biology and Center for Genomics and Systems Biology, New York University,  
9 New York, USA

10 <sup>2</sup>Department of Ecology and Evolution, University of Chicago, IL, USA

11 <sup>3</sup>LIPME, Université de Toulouse, INRAE, CNRS, Castanet-Tolosan, France

12 § Corresponding author: Joy Bergelson ([jb7684@nyu.edu](mailto:jb7684@nyu.edu))

13

14 **Keywords:** genome-wide association study, plant defense, metabolites, spatial scale, mapping  
15 population

## 16 **Abstract**

17 A paradoxical finding from genome-wide association studies (GWAS) in plants is that variation  
18 in metabolite profiles typically maps to a small number of loci, despite the complexity of  
19 underlying biosynthetic pathways. This discrepancy may partially arise from limitations  
20 presented by geographically diverse mapping panels. Properties of metabolic pathways that  
21 impede GWAS by diluting the additive effect of a causal variant, such as allelic and genic  
22 heterogeneity and epistasis, would be expected to increase in severity with the geographic range  
23 of the mapping panel. We hypothesized that a population from a single locality would reveal an  
24 expanded set of associated loci. We tested this in a French *Arabidopsis thaliana* population (< 1  
25 km transect) by profiling and conducting GWAS for glucosinolates, a suite of defensive  
26 metabolites that have been studied in depth through functional and genetic mapping approaches.  
27 For two distinct classes of glucosinolates, we discovered more associations at biosynthetic loci  
28 than previous GWAS with continental-scale mapping panels. Candidate genes underlying novel  
29 associations were supported by concordance between their observed effects in the TOU-A  
30 population and previous functional genetic and biochemical characterization. Local populations  
31 complement geographically diverse mapping panels to reveal a more complete genetic  
32 architecture for metabolic traits.

33

## 34 1. Introduction

35 Plants produce a vast array of structurally diverse secondary metabolites that collectively  
36 underpin a variety of functions -- from regulating growth and development, to tolerating abiotic  
37 stresses, attracting pollinators, and deterring pathogens and herbivores [1]. Illuminating the  
38 genetic architecture of secondary metabolism is not only integral to understanding plant  
39 physiology, adaptation, and diversity across environments [2]; it also provides precise routes to  
40 breed or engineer more durable and productive crops [3].

41 In recent years, genome-wide association studies (GWAS) have emerged as a tool of  
42 choice for elucidating the genotype-to-phenotype links that shape plant metabolic diversity [3–  
43 5]. GWAS involve tests for statistical associations between genetic variants and organismal  
44 phenotypes. Because they require only genotypic and phenotypic information across a panel of  
45 natural plant genotypes (accessions), GWAS offer a straightforward and efficient method for  
46 inferring genotype-to-phenotype links from datasets of millions of SNPs across the genome and  
47 thousands of metabolites, enabled by the parallel advances in genome sequencing and  
48 metabolomic profiling.

49 A paradoxical pattern emerging from the application of GWAS to plant metabolic  
50 features, however, is that only a few loci are associated with variation in the abundance of a  
51 given metabolite [5]. Indeed, an average of fewer than two significant loci per metabolite were  
52 discovered across four GWAS studies encompassing >6,500 metabolites in leaves and/or seeds  
53 of *Arabidopsis*, rice, and maize (N = 305-529 plant accessions per study) [6–9]. Such simple  
54 genetic architectures are surprising given that secondary metabolites are often the product of  
55 biosynthetic pathways that have many enzyme-catalyzed steps, as well as the capacity to interact  
56 with additional pathways [10]. On the other hand, some physical and topological properties  
57 inherent to biosynthetic pathways predict that mutations in certain genes will have outsized  
58 effects, and thus impose evolutionary constraints unevenly across genes in a pathway [11,12].  
59 While this heterogeneity may help explain the simple genetic architectures revealed for  
60 metabolites by GWAS, it's also clear that some true signals are lost. In particular, GWAS fails  
61 to replicate many functionally-validated loci uncovered through other techniques for  
62 interrogating the genetic basis of metabolic variation, such as QTL mapping [13].

63 Much attention has been paid to forces that reduce the efficacy of GWAS, and to both  
64 experimental designs and statistical approaches to mitigate them [14,15]. One relatively  
65 understudied factor is the composition of the mapping panel, especially the geographic  
66 distribution over which accessions are drawn [14,15]. This is an important consideration because  
67 GWAS mapping panels in plants have conventionally been assembled over broad geographic  
68 scales, such as the *Arabidopsis* Regional Mapping Population (RegMap) and 1001 Genomes  
69 Project (1001G), which are composed predominantly of accessions collected across the European  
70 continent [16,17]. This design ensures that a broad swath of the species' genetic diversity is  
71 included within the mapping panel, one of the main advantages of GWAS compared to QTL  
72 mapping. However, it also exposes analyses to a variety of geographically-driven confounding  
73 forces.

74 The most popularized cause of confounding driven by geography concerns population  
75 structure [18,19]. False positive associations arise at non-causal variants whose genotypes are

76 correlated (i.e., in long-range linkage disequilibrium) with causal variants, and geographic  
77 population structure is a major source of these correlations [18]. Accounting for differences in  
78 relatedness among accessions (e.g., through the inclusion of a relatedness matrix in the GWAS  
79 model) controls these spurious associations [20,21], but at the cost of reducing power to detect  
80 causal variants whose geographic distribution tracks major axes of population structure [22,23].  
81 This limitation is likely to be more prevalent for traits underlying local adaptation over broad  
82 geographic scales [15], which may make it particularly relevant for specialized metabolites.

83         However, even with effective control for the effects of long-range linkage disequilibrium,  
84 additional confounding factors are strengthened in geographically structured populations. Three  
85 processes in particular can dilute the strength of association at a causal variant. First, many  
86 alleles have geographically restricted distributions, causing the genetic basis of a trait to vary  
87 across regions (genetic heterogeneity) [14,24,25]. A variant's phenotypic effect is thus diluted by  
88 averaging across these regions. Because rare alleles tend to be more geographically restricted  
89 [26], mapping within local or regional panels would have the benefit of elevating the frequencies  
90 of some rare alleles relative to their species-wide frequency, while eliminating others that are  
91 absent from the region. This would enhance the ability to detect rare, informative SNPs, at least  
92 in some regions. Second, a locus can have more than two functionally-distinct haplotypes (allelic  
93 heterogeneity), especially in geographically broad mapping panels that have high genetic  
94 diversity [14,27]. Because GWAS typically interrogates biallelic SNPs, a variant's effect is  
95 diluted by averaging across the haplotypes tagged by each allele. Third, population structure  
96 across multiple causal loci can produce different genotypic combinations in different geographic  
97 regions. GWAS is less powerful when a causal variant's effect is markedly weakened in some  
98 genetic backgrounds due to epistasis, since standard GWAS models are formulated to detect  
99 average additive effects across genetic backgrounds [28,29]. All of these factors point to the  
100 benefit of mapping in local panels, provided that adequate phenotypic and genetic variation is  
101 present.

102         Glucosinolates (GSLs), the primary class of secondary defensive metabolites in  
103 *Arabidopsis* and a model system for the genetics of plant secondary metabolism [30], offer a  
104 compelling opportunity to test the hypothesis that a local GWAS mapping population can better  
105 expose the genetic architecture of a complex trait than a geographically broad GWAS  
106 population. Glucosinolate biosynthesis has a polygenic basis, including a number of sequential  
107 enzyme-catalyzed reactions to produce a given aliphatic GSL (Methionine-derived, 12-15  
108 reactions) or indolic GSL (Tryptophan-derived, 7-9 reactions) from their precursor amino acid  
109 [31]. Each step of the pathway has been functionally characterized through forward and reverse  
110 genetics approaches, leading to the identification of at least 45 genes involved (which is greater  
111 than the number of reactions due to functional redundancy among paralogs) [31]. Yet three  
112 GWAS of aliphatic GSL variation with large mapping populations ( $N > 300$ ) spanning across  
113 Europe have consistently described associations at only three biosynthetic loci [6,13,32], even  
114 though the causal polymorphisms underlying mapped QTL have been localized to additional  
115 biosynthetic genes [33].

116         Intriguingly, conditions for all the sources of confounding detailed above are met for  
117 GSLs across the European distribution of *Arabidopsis* [13]. Recurrent loss of function and gene  
118 conversion events have generated complex patterns of allelic heterogeneity, including rare  
119 variants, and the geographically restricted distributions of functionally-defined haplotypes at a

120 few major-effect loci implies strong genic heterogeneity [13,32,34]. Higher-order epistatic  
121 interactions among these loci determine which GSL molecules accumulate, resulting in GSL  
122 profiles that can be binned into qualitative “chemotypes,” defined by whether the gene(s) at each  
123 locus are functional [35]. Distributions of these epistatically-defined chemotypes are also  
124 geographically biased, displaying regional or continental clines shaped by a combination of  
125 demography and local adaptation [13,32]. If similar patterns have arisen at other loci with more  
126 modest phenotypic effects, geographic confounding might hinder their detection through GWAS;  
127 at the very least, large effect epistasis has been documented for other GSL biosynthetic enzymes  
128 [33,36]. Finally, even without geographic confounding, allelic heterogeneity, or epistasis, loss-  
129 of-function variants at major biosynthetic enzymes that are not captured well by polygenic  
130 genomic background effects in GWAS might add phenotypic noise that overwhelms modest  
131 signals of association at other loci.

132 Here, we quantified variation in GSL profiles in a single local population of *Arabidopsis*,  
133 compared the genetic architecture revealed through GWAS in this local population and in  
134 geographically broad mapping panels, and explored potential confounding factors underlying  
135 differences in the performance of the mapping populations. We focused on a population from  
136 Toulon-Sur-Arroux (TOU-A), France, which was collected along a fence line spanning only a  
137 few hundred meters [37]. Previous investigations found that the TOU-A population harbors less  
138 than 20% of the variants segregating at detectable frequencies in the 1001G, yet variants  
139 underlying heritable variation for a wide range of morphological, growth, defense, and fitness-  
140 related traits in TOU-A can be successfully mapped using GWAS in this local population  
141 [37,38]. We restricted our focus to genes with validated functions in GSL biosynthesis, broadly  
142 defined to include core structure formation, side-chain elongation, and secondary modification  
143 [31]. Decades of research has compiled a near-exhaustive catalog of the genes participating in  
144 these processes and their substrate specificities, providing functional data supporting novel  
145 associations that we uncovered at these loci. Overall, the expanded catalog of natural  
146 polymorphisms shaping GSL variation in the TOU-A population suggests that GWAS in local  
147 mapping populations could complement and expand the genetic architecture for metabolic  
148 variation revealed from geographically broad mapping panels.

## 149 **2. Methods**

### 150 **(a) Plant growth.**

151 To minimize maternal effects, seeds were harvested from 305 TOU-A accessions grown  
152 at 22°C with a 16:8h light:dark photoperiod, with 3wks vernalization at 4°C in 8h:16h light:dark  
153 to synchronize flowering, in fall 2017. For GSL profiling in mid-2019, seeds were sown on a 1:1  
154 blend of nutrient retention (BM1) and seed germination (BM2) soil mixes (Berger, CA) in a  
155 complete randomized block design with four replicates of 294 accessions. After 4d stratification  
156 at 4°C, growth trays were moved to a chamber with white LED light (180-200  $\mu\text{mol}\cdot\text{s}^{-1}$ ) at 20°C  
157 in 10h:14h light:dark. Seedlings were thinned to one per cell 1wk after germination. Trays were  
158 rotated and bottom-watered every second day with fertilizer (15N-16P-17K) solution at 100 ppm  
159 N until harvesting at 21d.

160 **(b) GSL Extraction and Quantification.**

161 All liquid preparation and storage steps throughout the following protocol were  
162 conducted in polypropylene 96-well plates sealed with silicone cap mats. Entire rosettes were  
163 first clipped from the root, weighed, and directly submerged into 1.2 mL 80% methanol, which  
164 inhibits endogenous myrosinase activity [39]. After 2d dark incubation at ambient temperature,  
165 samples were centrifuged for 1m at  $4000 \times g$ , and the supernatant was transferred into a fresh  
166 plate and stored at  $-80^{\circ}\text{C}$ . Immediately prior to GSL profiling,  $240\mu\text{L}$  was evaporated with a 96-  
167 pin air drier in a fresh plate and redissolved in  $120\mu\text{L}$  25% methanol. This approach was chosen  
168 after favorable comparisons to alternative extraction methods with freezing and/or  
169 homogenization steps (see Supplemental Note).

170 GSL content was quantified with an Agilent 1200 Series HPLC machine coupled to an  
171 Agilent 6410 triple quadrupole mass spectrometer with parameters described in [40]. Samples  
172 were eluted with 0.1% formic acid in water (A) and 100% Acetonitrile (B) using the following  
173 separation gradient: 3.5 min of 99% A followed by a gradient from 99% to 65% A (1 to 35% B)  
174 over 12.5 min, and a wash with 99% B for 4 min with 5 min post-run re-equilibration to 99% A.  
175 The mass spectrometer was run in precursor negative-ion electrospray mode, monitoring all  
176 parent ions from  $m/z$  350–520 with daughter ions of  $m/z$  97, which correspond to the sulfate  
177 moiety of the GSL analytes. External standards (sinigrin, every 12th sample; and a GSL extract  
178 from a mixture of TOU-A genotypes, every 24th sample) interspersed throughout each run were  
179 monitored to ensure consistency. Individual GSLs were identified based on their fragmentation  
180 pattern and retention time [32] (Table S1). Intensities for each molecule were integrated using  
181 *MSnbase* v2.8.3 [41] and *xcms* v3.4.4 [42], using a customized approach that did not require  
182 delineating discrete peak boundaries and thus enabled increased sensitivity for low abundance  
183 molecules (see Supplemental Note).

184 **(c) Genotypes.**

185 Genotypes for the TOU-A population were obtained from [37]. Genotype data for the  
186 RegMap [16] and 1001G [17] datasets were obtained from [43]. For the 1001G dataset, this  
187 consisted of SNPs that were directly genotyped through whole-genome resequencing (WGS).  
188 For the RegMap panel, this consisted of SNPs that were directly genotyped with a 250K SNP  
189 chip and supported by WGS in resequenced accessions, and SNPs imputed by intersecting the  
190 RegMap chip genotypes and 1001G WGS genotypes. 2.8M SNPs with greater than 95%  
191 imputation accuracy were retained, which primarily excludes SNPs with low-frequency alleles.

192 **(d) Broad-Sense Heritability of GSLs.**

193 We fitted linear mixed models for log-transformed ion counts per milligram of leaf tissue  
194 using *lme4* [44], including random intercept effects for the accession identity and for the plate  
195 containing the sample during extraction and HPLC-MS/MS quantification. Heritability was  
196 estimated as the proportion of variance explained by accession identity after excluding variance  
197 explained by sample plate identity. Significance of accession identity was assessed by a  
198 likelihood ratio test with one degree of freedom. For published measurements of Regmap [32]

199 and 1001G [13] accessions, an identical model was implemented using GSL abundances scaled  
200 by sample weights as reported by the authors.

### 201 **(e) GWA Mapping.**

202 To standardize comparisons across datasets, analyses were conducted identically for the  
203 TOU-A, 1001G, and RegMap datasets. First, best unbiased linear predictors (BLUPs) were  
204 extracted from the linear mixed models above; for one dataset [6] that pooled biological  
205 replicates, abundances from the single technical replicate per accession were used directly.  
206 Values were converted to z-scores so that GWAS would produce effect size estimates in units of  
207 phenotypic standard deviations. Second, GWAS were implemented as linear mixed models in  
208 GEMMA v0.98.1 [45], including a centered genetic relatedness matrix (-gk 1) to account for  
209 population structure. Significance per SNP was assessed by Wald Tests (-lmm 1).

210 Traits that were modeled separately for GWAS included (1) abundances of each of the  
211 heritable GSL molecules, and (2) log<sub>2</sub>-transformed ratios of the abundances of pairs of molecules  
212 with precursor:product relationships (Fig. S1). For indolic GSLs in TOU-A, we also  
213 implemented a multi-trait GWAS approach (multivariate linear mixed model, mvLMM [46]),  
214 which jointly models the relationships between the abundances of all detected molecules. Severe  
215 genomic inflation and/or algorithmic termination errors prevented the implementation of these  
216 models for other molecules and mapping panels. Unless otherwise stated, all GWAS excluded  
217 SNPs with minor allele frequency (maf) < 5% or missing genotypes in > 5% of the accessions  
218 (relaxed to 10% for TOU-A, which had more uncalled sites). We excluded a small number of  
219 GWAS exhibiting systematic genomic inflation as determined from the median *P*-value ( $\lambda >$   
220 1.04) or an excess of associated SNPs (98th percentile of genome-wide *P*-values < 0.01).

221 To search for significant associations harboring GSL biosynthetic loci, we used a recently  
222 compiled catalogue of functionally validated genes in the aliphatic and indolic GSL biosynthetic  
223 pathways ([31]; categories: side chain elongation, core structure synthesis, side chain  
224 modification). Because peaks of association at known GSL biosynthetic loci in previous GWAS  
225 reside tens or even hundreds of kb from the causal genes [13,32,34]--which may arise from  
226 extended causal haplotypes [34], structural variants, or intergenic regulatory variants--we defined  
227 candidate SNPs as those within 30kb of known biosynthetic genes. For the three loci with  
228 significant SNPs in our re-analysis of the 1001G and RegMap datasets, for which the causal  
229 genes are well-established, we further extended these windows in 10kb increments until they  
230 captured 90% of the SNPs within 0.5Mb of the known causal loci (AOP2/3, GS-OH, MAM1/3)  
231 that harbored significant associations with single GSL molecules or precursor:product ratios in  
232 those datasets.

### 233 **(f) Population Genetic Comparisons.**

234 Methods for all population genetic analyses are described in the Supplementary Methods.

235

### 236 3. Results

#### 237 **(a) A deficit of rare alleles in the local TOU-A population.**

238 A population genetic comparison between TOU-A and the European 1001G accessions  
239 revealed favorable conditions for GWAS relative to geographically broad mapping panels. First,  
240 for the particular example of glucosinolates, we found that epistatic variation increases rapidly  
241 with geographical distance (Fig. 1a). Second, despite reduced overall diversity (1.9M SNPs in  
242 TOU-A vs. 11.5M SNPs in 1001G), the TOU-A population (1.3M) and 1001G panel (2.2M) had  
243 a relatively comparable number of common variants (defined here as biallelic SNPs with maf >  
244 0.03). Indeed, a large fraction of common variants from the 1001G panel (2.2M) were also  
245 common in TOU-A (0.83M, 38%), indicating the reduced genetic diversity in TOU-A arises  
246 from a lessened contribution of rare variants. This was reflected in the allele frequency spectrum:  
247 after downsampling the 1001G to account for differences in sample size, the TOU-A population  
248 still displayed a less pronounced enrichment of rare relative to higher frequency variants (Figure  
249 1b), resulting in higher genome-wide values of Tajima's D (Fig. 1c). This strong reduction in  
250 rare variants is expected to reduce confounding effects of allelic heterogeneity in TOU-A, while  
251 the presence of many common variants suggests this does not come at the expense of drastically  
252 culling the polymorphisms that can be interrogated through GWAS.

#### 253 **(b) Heritable variation in glucosinolate profiles within the local TOU-A population.**

254 We quantified the relative concentrations of 13 major aliphatic and four indolic  
255 glucosinolates in 294 accessions from the TOU-A population under controlled growth chamber  
256 conditions. In contrast to broader geographic scales, where loss-of-function mutations within the  
257 glucosinolate biosynthetic pathway are pervasive, every TOU-A accession exhibited a fully  
258 functional GSL biosynthetic pathway. This was evidenced by abundant concentrations of the  
259 final products in the biosynthetic pathways for both short-chain aliphatic and indolic GSLs (Fig.  
260 S2).

261 Genetic differences among individuals explained significant portions of the between-  
262 accession variation in abundance for every GSL molecule: broad-sense heritabilities ranged from  
263  $0.19 < H^2 < 0.92$  (all  $P_{Bonferroni} < 0.05$ ). In fact, analysis of GSL measurements from previous  
264 studies revealed systematically higher heritability estimates in TOU-A than the RegMap (Sign  
265 Test, median difference = 0.16 [95%CI:0.04,0.31],  $P = 0.02$ ) and no significant difference  
266 between TOU-A and the 1001G (median difference = 0.04 [-0.20,0.20],  $P = 0.46$ ) (Fig. 2).  
267 Although experimental design, tissue sampling, or data collection variables across studies could  
268 contribute to differences in heritability among the mapping populations, these data clearly  
269 indicate a high level of heritability for GSL traits within the local TOU-A population, even in the  
270 absence of the loss-of-function alleles at biosynthetic loci that have dramatic effects on GSL  
271 profiles across broader geographic scales.



272 **(c) GWAS within the local TOU-A population reveals known and novel variants shaping**  
273 **aliphatic glucosinolate profiles.**

274 For 192 phenotyped accessions with whole genome sequences, we conducted GWAS  
275 using mixed models that controlled for confounding due to population structure by including a  
276 matrix of kinship among accessions as a random effect. We first focused on the abundances and  
277 relationships between 13 aliphatic GSLs.

278 Significant associations. The identity of associated loci in TOU-A depended on how GSL  
279 phenotypes were represented. Separate GWAS for the abundance of each molecule cumulatively  
280 uncovered significant associations at five biosynthetic loci (Fig. 3a). Given the strong positive  
281 and negative genetic correlations among GSL molecules in the TOU-A population (Fig. S3), we  
282 reasoned that mapping approaches utilizing these additional relationships may reveal additional  
283 associations. Indeed, using ratios of the abundances of individual precursor vs. product GSLs as  
284 the mapped traits cumulatively revealed significant associations at five biosynthetic loci,  
285 including two loci not recovered from GWAS using individual GSL abundances (Fig. 3b).

286 The significant associations included the three loci (GS-OH, AOP, MAM) that we also  
287 recovered using the same approaches in a re-analysis of previous GWAS datasets, which  
288 consisted of mapping populations spanning the European continent ( $N > 300$  accessions) (Fig. 3c  
289 & S4a). Many of these same associations were reported in the authors' original analyses  
290 [6,13,32]. However, the GS-OX locus had not been mapped in the three GWAS with large  
291 mapping populations (although it was successfully mapped in biparental RILs) [33,47,48], and  
292 effects of natural polymorphisms in the BCAT3, CYP79F1, and CYP83A1 genes had not been  
293 described in any mapping study.

294 Effects on GSL profiles. A model for how the putatively causal enzymes at the seven  
295 significant loci generate GSL profile variation in the TOU-A population emerges simply by  
296 overlaying the reaction catalyzed by each enzyme, from precursor to product molecules, onto a  
297 plot of the major aliphatic GSLs detected in TOU-A plants. This produces a visual map of the  
298 variable steps in the biosynthetic pathway (Fig. 3d). We sought to use these relationships,  
299 supplemented with GSL profiles from gene knock-out mutants in previous studies, to validate  
300 each locus by comparing them to the effects inferred in our GWAS. To do this, we identified the  
301 leading SNP (i.e., the SNP with the strongest experiment-wide  $P$ -value) at each locus, extracted  
302 its GWAS model-fitted effect on the abundance of each GSL molecule, and visualized the effects  
303 on the map of GSL molecular variation in TOU-A (Fig. 3e). In addition to offering further  
304 evidence supporting the hypothesized causal genes at each locus, this approach illuminates how  
305 these loci generate different aspects of GSL profile variation in the TOU-A population.

306 The effects of the BCAT3 locus in TOU-A suggest that this gene underlies a dimension  
307 of variation in GSL side-chain length previously undescribed in natural populations of  
308 *Arabidopsis*, distinct from effects of the well-characterized variation at the MAM locus. The  
309 BCAT3 locus affected the abundances of GSLs with intermediate-length side chains, mirroring  
310 effects previously observed in a BCAT3 knockout mutant (Fig. 3e & S5). By contrast, functional  
311 genetic and biochemical assays have shown that the MAM1 and MAM2 enzymes primarily  
312 affect the abundance of GSLs with short side chains [49], similar to the inferred effect of the

313 MAM locus in TOU-A, and MAM3 primarily affects the abundance of GSLs with long side  
314 chains (Fig. 3e & S5).

315 Of two previously unreported associations at cytochrome P450 monooxygenases  
316 functioning downstream of MAM and BCAT3 in the biosynthetic pathway (Fig. 3d), the novel  
317 association at the paralogous CYP79F1 and CYP79F2 genes [50] is especially noteworthy. The  
318 leading SNP at this locus was associated with a larger magnitude of effect on some short-chain  
319 molecules in TOU-A than MAM or BCAT3 (Fig. 3e), with especially large effects on molecules  
320 with the shortest observed side-chain length. This is consistent with the finding that among all  
321 biosynthetic enzymes, CYP79F2 exerts the strongest effect on pathway flux, with an outsized  
322 effect on propyl GSLs (i.e., GSLs with 3C side-chain lengths) [12]. Functional polymorphism at  
323 a CYP79F gene also underlies a QTL affecting the propyl fraction of GSLs in *Brassica juncea*  
324 [51], and separately underlies adaptive variation in the proportion of GSLs derived from  
325 branched-chain amino acids relative to methionine in *Boechera stricta* [52]. The association at  
326 CYP79F paralogs was recovered in our re-analysis of one European *Arabidopsis* dataset (Fig.  
327 S4), strengthening the evidence that CYP79F is a broadly important determinant of GSL profile  
328 variation across populations and species.

329 Two distinct loci harbor paralogous GS-OX genes that catalyze the *S*-oxygenation of  
330 methylthioalkyl to methylsulfinylalkyl GSLs with broad substrate specificity. While natural  
331 variation in the locus containing GS-OX2, GS-OX3, and GS-OX4 had been detected through  
332 QTL mapping with biparental RILs [47,48], neither locus had been detected in the three large,  
333 European GWAS panels. In addition to harboring a significant association when considering  
334 common variants (minor allele frequency,  $maf > 0.05$ ; Fig. 3a), GS-OX1 harbored the strongest  
335 genome-wide association for many molecules when slightly rarer variants were considered ( $maf$   
336  $> 0.03$ ; Fig. S6). Although biases in our GWAS model can yield inflated or deflated signals of  
337 association for alleles below this threshold, the strength of the association for this variant is  
338 exceptional even among alleles of similar frequency ( $0.05 > maf > 0.03$ ). Intriguingly, the  
339 strongest associations at GS-OX1 did not involve methylthioalkyl GSL abundances individually  
340 or as a ratio compared to their derived methylsulfinylalkyl GSLs (Fig. S6), suggesting that  
341 linkage disequilibrium with other loci (or an unexpected effect of GS-OX1) may contribute to  
342 this association. Nevertheless, the effect on its direct precursor and/or product molecules is  
343 sufficient to drive a significant association: we further performed GWAS for a principal  
344 component capturing opposing shifts in the abundance of long-chain methylthioalkyl vs.  
345 methylsulfinylalkyl GSLs, and GS-OX1 harbored the strongest, statistically significant genome-  
346 wide association (Fig. S6).

347 Finally, effects of the two remaining polymorphisms in TOU-A, at the AOP [53] and GS-  
348 OH [54] loci, differed from the effects of loss-of-function variants at these loci that segregate  
349 over broad geographic scales, which eliminate the production of their GSL products and generate  
350 qualitative presence/absence variation in GSL profiles [13]. In TOU-A, by contrast, both loci  
351 affected their precursor GSL abundances, with only GS-OH also oppositely affecting (but not  
352 abolishing) its product GSL abundances (Fig. 3e).

353 It is important to note that the predicted effects do not include epistatic interactions, and  
354 that more subtle effects may not be discovered through GWAS. Accordingly, the effects  
355 described above should be interpreted only as the strongest, additive effects of each locus.

356 **(d) GWAS within the local TOU-A population reveals known and novel variants shaping**  
357 **indolic glucosinolate profiles.**

358 Significant associations. We implemented the same association mapping approach for  
359 four indolic GSL molecules, and were most successful when mapping traits that captured the  
360 relationships among abundances of different molecules. Three biosynthetic loci were significant  
361 in a multi-trait GWAS jointly modeling the abundance of all four indolic GSLs detected in TOU-  
362 A (Fig. 4a).

363 Of these three loci, two (both CYP81F loci) have been previously identified in GWAS  
364 [6] and remained the only two significant associations in our re-analysis of other datasets (Fig.  
365 4b & S4). One of these loci was also discovered through QTL mapping, and CYP81F2 was  
366 functionally validated as the causal gene [55,56]. The IGMT locus had not been linked to natural  
367 variation in GSL profiles previously.

368 Effects on GSL profiles. Each putatively causal biosynthetic enzyme underlying the  
369 associations with indolic GSL variation in TOU-A has been functionally characterized through  
370 biochemical assays and in gene knockout mutants. CYP81F paralogs collectively catalyze the  
371 first elaboration step at different sites of indolic GSL ring structure [55,56], and IGMT paralogs  
372 collectively catalyze a subsequent elaboration step [57] (Fig. 4c). Using the effects of each locus  
373 extracted from our GWAS models, we looked for concordance between our GWAS (Fig. 4d) and  
374 previous QTL mapping, functional genetic, and knockout mutant studies to inform how these  
375 loci shape GSL variation in TOU-A.

376 The CYP81F subfamily of cytochrome P450 monooxygenases are responsible for  
377 hydroxylation of indolyl-3-ylmethyl (I3M) GSL [55,56], which can subsequently be  
378 methoxylated by other enzymes. The locus harboring CYP81F2 affected two GSL molecules in  
379 TOU-A (4-hydroxy-I3M-GSL and its derivative, 4-methoxy-I3M-GSL), which also differentially  
380 accumulate due to the CYP81F2 locus in a previous QTL mapping experiment [56]. The locus  
381 harboring CYP81F1, CYP81F3, and CYP81F4 paralogs affected the GSL that is methoxylated at  
382 a different site, 1-methoxy-I3M-GSL; the CYP81F-catalyzed product from which it derives, 1-  
383 hydroxy-I3M-GSL, is unstable and was not observable through our GSL profiling approach.  
384 These results further support evidence from previous mapping studies that paralogs at the two  
385 CYP81F loci affect different GSL molecules *in planta*, despite overlap in substrate specificities  
386 *in vitro* [55,56].

387 Four of the five indole glucosinolate O-methyltransferases (IGMT1-4) in *Arabidopsis*  
388 form a tandem array at the locus identified in our GWAS [57]. This locus had a strong effect on  
389 the abundance of its substrate, 4-hydroxy-I3M-GSL (Fig. 4d). Although IGMT1-4 enzymes  
390 cumulatively can methoxylate both 1- and 4-hydroxy-I3M-GSL in biochemical assays, our  
391 observation of effects restricted to 4-hydroxy-I3M-GSL methoxylation support a model  
392 previously inferred from the characterization of an IGMT5 knockout mutant, which retained  
393 functional copies of all four IGMT1-4 paralogs [57]. The mutant exhibited an absence of 1-  
394 methoxy-I3M-GSL but no reduction in 4-methoxy-I3M-GSL, suggesting the IGMT1-4 locus is  
395 responsible only for 4-methoxy-I3M-GSL's production *in planta*.

396 Taken together, our results more fully link the functional variation characterized in  
397 enzyme biochemical and gene knockout studies with the variation for indolic GSLs observed in  
398 natural populations, identifying loci acting at three of the four secondary modification steps that  
399 give rise to the major I3M-derived GSLs in the TOU-A population.

400 **(e) Reduced population structure is unlikely to underlie improved performance of GWAS**  
401 **for glucosinolate profiles in the local TOU-A population.**

402 GSL profiles, and some of the large effect loci that underlie them, show strong  
403 geographic clines within and across Europe [13,32]. This raises the possibility that methods to  
404 control for population structure in GWAS could weaken signals of association with GSLs at loci  
405 whose genotypes are strongly correlated with population structure. To investigate this, we used  
406 ADMIXTURE to infer subgroups ( $k = 5$ ) contributing to population structure separately within  
407 the TOU-A and the 1001G accessions. Focusing on the ten glucosinolate biosynthetic loci  
408 recovered by GWAS in TOU-A, we found that among-group variation in allele frequency was  
409 not elevated in the 1001G relative to TOU-A (Fig. S7). This suggests that the efficacy of GWAS  
410 for GSLs in TOU-A is unlikely to be the product of weaker population structure at causal loci,  
411 and may instead arise from differences in other confounding factors that are exaggerated in  
412 geographically broad mapping panels.

413 **4. Discussion**

414 As one of the best-studied secondary metabolite pathways in plants--with a wealth of  
415 functional genetic knowledge from GWAS and QTL mapping of natural variation,  
416 characterization of genetic mutant lines, and enzyme biochemical assays [30]--GSLs offered a  
417 compelling opportunity to investigate the performance of GWAS using a local mapping  
418 population. The expanded genetic architecture revealed for GSLs in the TOU-A population  
419 highlights the benefits of this approach. A modest mapping panel ( $N=192$  accessions) led not  
420 only to the discovery of variants that were absent in geographically broad mapping panels with  
421 1.5-4x more accessions, but also to novel loci whose contribution to natural variation was  
422 unknown despite numerous QTL mapping studies previously conducted for GSLs. These  
423 associations spanned each major portion of the pathway (Fig. 5): the MAM-catalyzed reaction  
424 loop for side-chain elongation in GSL precursor molecules, sequential steps for synthesis of the  
425 GSL core structure, and every level of secondary modification subsequent to the formation of a  
426 functional GSL molecule [31]. Thus, GWAS within a single population can offer a deep catalog  
427 of functional polymorphism within a biosynthetic pathway.

428 The simplest explanation for the effectiveness of GWAS in TOU-A may be the observed  
429 reduction in genetic diversity relative to the broader European population. Theory predicts that  
430 allelic heterogeneity, which poses a major obstacle for GWAS, will be more pervasive in more  
431 genetically diverse populations. Further, the fact that diversity was reduced in TOU-A primarily  
432 through a relative deficit of rare variants, as expected if rare variants are geographically  
433 restricted and therefore locally more common [26], likely provides an additional benefit. Rare  
434 variants are not only poorly detected through GWAS, but their presence can obscure true  
435 associations at causal loci [58]. Consistent with this, GWAS has uncovered more associations

436 and a broader (albeit largely unvalidated) functional repertoire of underlying candidate genes--  
437 including biosynthetic enzymes, transcription factors, and transporters--across cultivars of  
438 *Brassica napus* than in European panels of *Arabidopsis* [59–61]. *B. napus* cultivars are less  
439 genetically diverse and have an excess of common variants (reflected in elevated Tajima's D)  
440 relative to *Arabidopsis* [17,61,62], which may have been further exaggerated at glucosinolate-  
441 related genes by the diversity-reducing effects of directional selection during the breeding  
442 process [62].

443 While the general benefits of reduced geography-driven confounding in local populations  
444 should extend to GWAS for a variety of traits, our findings also illustrate properties of local  
445 populations likely to be especially beneficial when studying metabolite diversity specifically. In  
446 particular, the confounding effects of loss-of-function polymorphisms were absent from the  
447 major loci (MAM, AOP, GS-OH) that segregate such mutations over broad geographic scales.  
448 Loss-of-function mutations produce a particularly severe form of allelic heterogeneity. Many  
449 different mutations can produce analogous loss-of-function alleles at a gene, resulting in a high  
450 gene-wide mutation rate, such that many loss-of-function polymorphisms involve multiple  
451 haplotypes with parallel loss-of-function mutations [27]. Furthermore, loss-of-function mutations  
452 underlie dramatic epistatic effects, which may dilute additive effects modeled by GWAS. An  
453 extreme example involves the GS-OH locus that catalyzes the final secondary modification in  
454 the biosynthetic pathway (Fig. 5): loss of function alleles at upstream enzymes fully mask the  
455 effect of GS-OH on GSL variation in the majority of genetic backgrounds in *Arabidopsis*, and  
456 GS-OH itself segregates numerous loss-of-function alleles [13]. Of the three major large-effect  
457 loci mapped in other GWAS of aliphatic GSLs, only GS-OH has failed to consistently yield  
458 associations across previous analyses [6,13,32,34].

459 Although statistical approaches exist to mitigate geographically-driven confounding  
460 factors, they cannot entirely control for them. For example, GWAS models can be extended to  
461 include epistatic interactions alongside, or instead of, additive effects [63]. However, the  
462 immense number of possible pairwise interactions across the genome creates computational  
463 challenges and a severe multiple testing burden [64]. Other confounding factors can be lessened  
464 by altering genotype information rather than the GWAS models themselves. One simple yet  
465 powerful approach involves collapsing all predicted loss-of-function variants at a gene into a  
466 single allele, reducing their contribution to allelic heterogeneity [65]. Nevertheless, this approach  
467 requires genotyping to be conducted through whole-genome sequencing, and even then, many  
468 cases of abolished or altered gene function are difficult to annotate from DNA sequence data  
469 alone. Furthermore, while this approach can improve power to discover associations at loci with  
470 heterogeneous loss-of-function variants, it does not address their confounding epistatic effects on  
471 other loci. Even in cases where various genotyping and statistical approaches do largely succeed  
472 in mitigating specific confounding factors, integrating them to address many factors  
473 simultaneously is challenging. For many research questions, the use of local mapping  
474 populations in which these confounding factors are lessened offers an attractive alternative to  
475 these more tailored GWAS approaches.

476 Despite their benefits, GWAS in local populations are certainly not ideal for every  
477 research question. GWAS of GSLs in different mapping populations illustrate this clearly:  
478 integrating population genomic analyses with GWAS using *Arabidopsis* accessions sampled  
479 throughout Europe revealed how GSL profiles have been shaped by adaptation and demography

480 across the species range [13,32,34], which would be impossible to infer from a single local  
481 population. Meanwhile, GWAS using the TOU-A population implicated more loci in natural  
482 phenotypic variation than could be detected in broader mapping panels. Complementary GWAS  
483 in local and geographically broad mapping panels thus provide an exciting avenue toward a  
484 fuller understanding of the genetic variation and evolutionary processes that shape phenotypic  
485 diversity in nature.

## 486 **5. Data Accessibility**

487 Raw data are accessible on the Dryad Digital Repository  
488 (<https://doi.org/10.5061/dryad.4mw6m90b6>). Scripts are available on GitHub  
489 ([https://github.com/peterlaurin/TOUA\\_Glucosinolate\\_GWAS](https://github.com/peterlaurin/TOUA_Glucosinolate_GWAS)).

## 490 **6. Authors' Contributions**

491 A.D.G., F.R., and J.B. conceived of the study. A.D.G, A.V., T.C.M., and J.B. collected  
492 the data. A.D.G, A.V., T.C.M., and P.J.L. analyzed the data. A.D.G. and J.B. wrote the  
493 manuscript.

## 494 **7. Funding**

495 Funding was provided by a Dropkin Foundation fellowship to A.D.G., grants from the  
496 France and Chicago Collaborating in Science (FAACTS) program and from the NIH (GM  
497 083068) to J.B., and support from the University of Chicago.

## 498 **8. Acknowledgments**

499 We thank Xiaohao Guo for assistance harvesting samples; John Zdenek and Tommy  
500 Clark for assistance with plant care; and Bader Arousse, Ella Katz, Daniel Kliebenstein, Arthur  
501 Korte, Baptiste Mayjonade, and members of the Bergelson Lab for sharing data and/or helpful  
502 feedback. Amélie Vergnol was a student in the *Magistère de Génétique* Graduate Program at  
503 Université de Paris when the work was conducted.

504

505

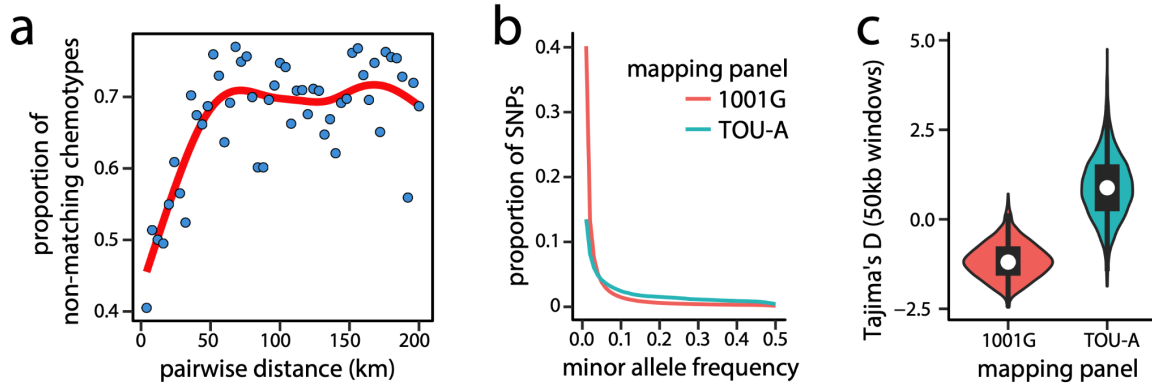

506

507 **Figure 1.**

508 **Reduced genetic complexity within local *Arabidopsis* populations.** (a) The proportion of non-  
509 matching GSL chemotypes, which reflect the joint genotype at three epistatically-interacting loci  
510 (MAM, AOP, GS-OH), increases sharply and then plateaus as a function of geographic distance  
511 in pairwise comparisons among accessions. Points represent comparisons among European  
512 1001G accessions in 4km bins. (b) The allele frequency spectrum is skewed toward common  
513 alleles in TOU-A relative to European accessions in the 1001G. The plotted lines were produced  
514 by connecting points indicating the proportion of SNPs falling into 1% bins of minor allele  
515 frequency. (c) Tajima's D is also elevated in TOU-A, shown as a distribution of values across  
516 50kb genomic windows. The 1001G panel was downsampled to 192 individuals to match TOU-  
517 A, and both populations were downsampled to 100 individuals per site, to avoid sample size and  
518 genotyping efficiency biases in panels b-c.

519

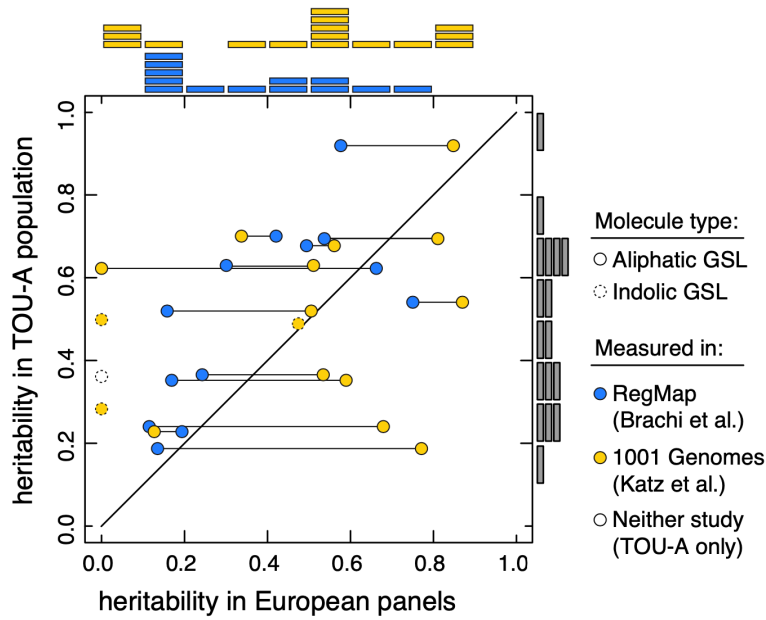

520

521 **Figure 2.**

522 **Glucosinolate variation is highly heritable within the TOU-A local population. (a)** Estimates  
523 of broad-sense heritability ( $H^2$ ) for each GSL molecule in the TOU-A population are plotted  
524 against estimates in broader European mapping panels. Connected points indicate estimates of  
525  $H^2$  for the same molecule in different European panels. Points above the diagonal line exhibit  
526 higher  $H^2$  in TOU-A. Histograms above and to the right of the plot indicate the distribution of  $H^2$   
527 values in each population.



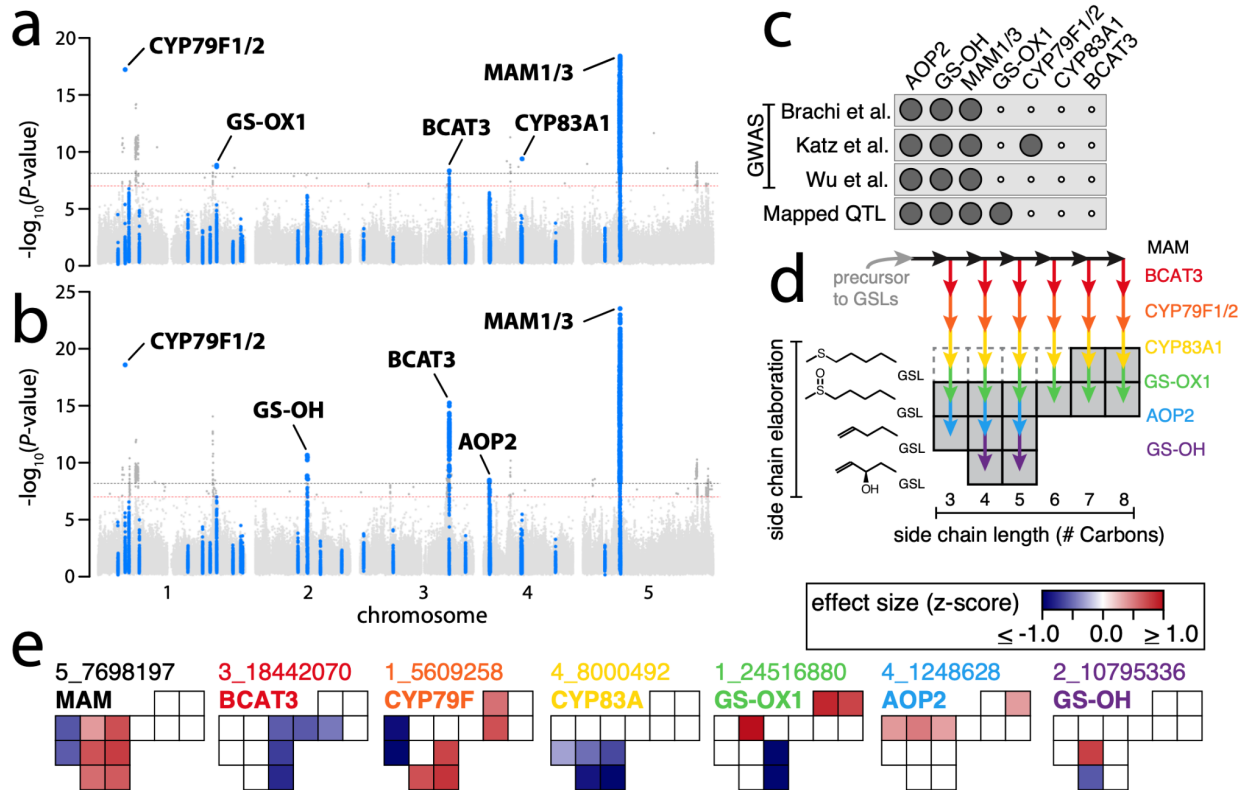

**Figure 3.**

530 **Seven biosynthetic loci are associated with aliphatic glucosinolate variation in the TOU-A**  
 531 **local population.** (a,b) The best  $P$ -value per SNP across individual GWAS, mapping either the  
 532 abundance of individual GSL molecules (panel a, 13 traits) or the ratio of individual precursor  
 533 vs. product molecule abundances (panel b, 17 traits). SNPs assigned to known GSL biosynthetic  
 534 loci (see Methods) are enlarged and colored blue. Dotted lines indicate the Bonferroni genome-  
 535 wide significance threshold for a single GWAS (red) or the full study (i.e., all individual GWAS  
 536 across which  $P$ -values were merged; black). (c) For each locus associated with GSL variation in  
 537 TOU-A, black circles indicate if the same locus was significant in GWAS in our re-analysis of  
 538 GSL datasets from large ( $N > 300$ ) European mapping populations [6,13,32] or was previously  
 539 mapped as a QTL using biparental RILs [33]. (d) A model for how these loci interact to generate  
 540 variation in GSL profiles for the major aliphatic GSLs present in TOU-A plants (shaded boxes).  
 541 Enzyme-catalyzed reactions from precursor to product are shown as colored arrows. Dashed  
 542 boxes indicate known intermediates that were not observed or quantifiable in TOU-A. (e) Effects  
 543 on individual aliphatic GSLs for the minor allele of the leading SNP at each locus (identified as  
 544 the SNP with the top association across any individual GWAS from panels a-b, named as  
 545 “chromosome\_position”). Boxes are oriented to represent the GSL molecules in panel d. Effect  
 546 sizes are shown for each single molecule GWAS with  $P < 0.01$  for the focal SNP.

547

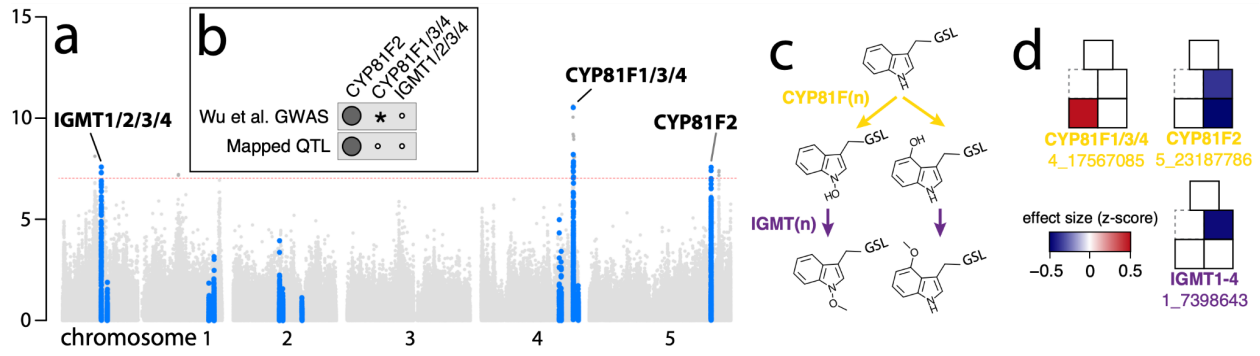

548

549 **Figure 4.**

550 **Three biosynthetic loci are associated with indolic glucosinolate variation in the TOU-A**  
551 **local population. (a)**  $P$ -values from a multi-trait GWAS (mvLMM) jointly modeling all indolic  
552 GSL abundances. The plot layout, colors, and significance thresholds are as described in Figure  
553 3a. **(b)** For each locus associated with GSL variation in TOU-A, black circles indicate if the  
554 same locus was significant in GWAS in our re-analysis of a GSL dataset from a large ( $N > 300$ )  
555 European mapping population [6] or was previously mapped as a QTL using biparental RILs  
556 [56]. “\*” indicates a significant association in a published analysis that was not recovered in our  
557 standardized re-analysis. **(c)** The pathway for secondary modification of indole-3-ylmethyl GSL  
558 (top) through 1- or 4-hydroxylation (middle) and subsequent methoxylation (bottom). **(d)** Effects  
559 on individual indolic GSLs for the minor allele of the leading SNP at each locus, determined as  
560 in Fig. 3e. Boxes are oriented to represent the GSL molecules in panel c.

561

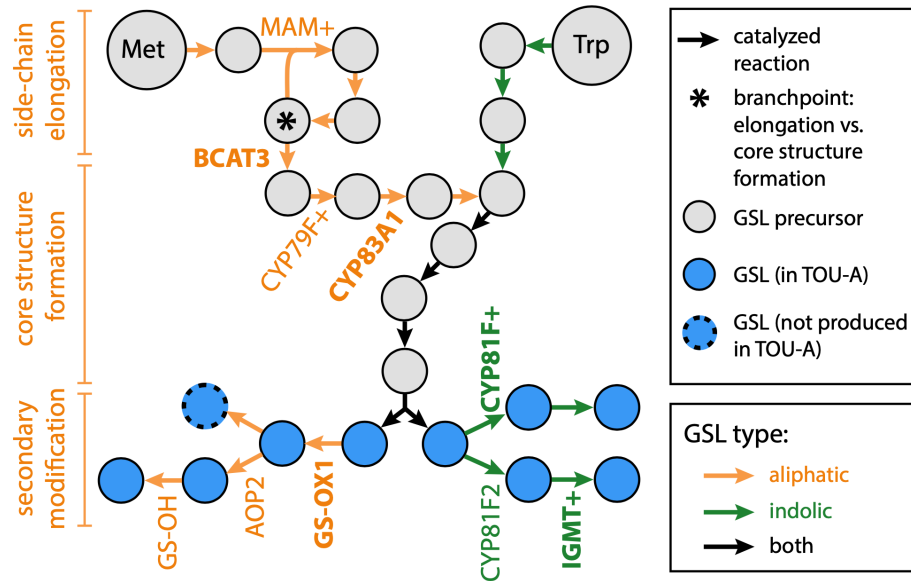

562

563 **Figure 5.**

564 **An overview of glucosinolate biosynthetic loci associated with GSL variation in the TOU-A**  
 565 **population.** The diagram shows each enzyme-catalyzed step, beginning with the amino acid  
 566 precursor (Met or Trp). Genes harboring significant GWAS associations in TOU-A are listed at  
 567 the biosynthetic step they catalyze. Bolded genes are novel associations, defined as those  
 568 significantly associated in TOU-A but not in our re-analysis of three datasets with geographically  
 569 broad European mapping panels. A “+” indicates that multiple paralogous genes at a locus could  
 570 contribute to the association (e.g., CYP79F1 and CYP79F2 are represented as CYP79F+). The  
 571 pathway and enzyme positions are based on [31]. Note that additional steps producing GSLs that  
 572 accumulate only at very low levels in leaves are omitted.

573

## 574 9. References

- 575 1. Weng J-K, Philippe RN, Noel JP. 2012 The rise of chemodiversity in plants. *Science* **336**,  
576 1667–1670.
- 577 2. Fernie AR, Tohge T. 2017 The genetics of plant metabolism. *Annu. Rev. Genet.* **51**, 287–  
578 310.
- 579 3. Pott DM, Durán-Soria S, Osorio S, Vallarino JG. 2021 Combining metabolomic and  
580 transcriptomic approaches to assess and improve crop quality traits. *CABI Agriculture and*  
581 *Bioscience* **2**, 1.
- 582 4. Luo J. 2015 Metabolite-based genome-wide association studies in plants. *Curr. Opin. Plant*  
583 *Biol.* **24**, 31–38.
- 584 5. Fang C, Luo J. 2019 Metabolic GWAS-based dissection of genetic bases underlying the  
585 diversity of plant metabolism. *Plant J.* **97**, 91–100.
- 586 6. Wu S *et al.* 2018 Mapping the Arabidopsis metabolic landscape by untargeted  
587 metabolomics at different environmental conditions. *Mol. Plant* **11**, 118–134.
- 588 7. Chen W *et al.* 2014 Genome-wide association analyses provide genetic and biochemical  
589 insights into natural variation in rice metabolism. *Nat. Genet.* **46**, 714–721.
- 590 8. Chen W *et al.* 2016 Comparative and parallel genome-wide association studies for  
591 metabolic and agronomic traits in cereals. *Nature Communications.* **7**.  
592 (doi:10.1038/ncomms12767)
- 593 9. Wen W *et al.* 2014 Metabolome-based genome-wide association study of maize kernel  
594 leads to novel biochemical insights. *Nat. Commun.* **5**, 3438.
- 595 10. Kliebenstein DJ. 2014 Synthetic biology of metabolism: using natural variation to reverse  
596 engineer systems. *Curr. Opin. Plant Biol.* **19**, 20–26.
- 597 11. Wright KM, Rausher MD. 2010 The evolution of control and distribution of adaptive  
598 mutations in a metabolic pathway. *Genetics* **184**, 483–502.
- 599 12. Olson-Manning CF, Lee C-R, Rausher MD, Mitchell-Olds T. 2013 Evolution of flux  
600 control in the glucosinolate pathway in *Arabidopsis thaliana*. *Mol. Biol. Evol.* **30**, 14–23.
- 601 13. Katz E *et al.* 2021 Genetic variation, environment and demography intersect to shape  
602 *Arabidopsis* defense metabolite variation across Europe. *Elife* **10**.  
603 (doi:10.7554/eLife.67784)
- 604 14. Korte A, Farlow A. 2013 The advantages and limitations of trait analysis with GWAS: a  
605 review. *Plant Methods* **9**, 1–9.
- 606 15. Brachi B, Morris GP, Borevitz JO. 2011 Genome-wide association studies in plants: the  
607 missing heritability is in the field. *Genome Biol.* **12**, 232.

- 608 16. Horton MW *et al.* 2012 Genome-wide patterns of genetic variation in worldwide  
609 *Arabidopsis thaliana* accessions from the RegMap panel. *Nat. Genet.* **44**, 212–216.
- 610 17. 1001 Genomes Consortium. 2016 1,135 Genomes reveal the global pattern of  
611 polymorphism in *Arabidopsis thaliana*. *Cell* **166**, 481–491.
- 612 18. Vilhjálmsson BJ, Nordborg M. 2013 The nature of confounding in genome-wide  
613 association studies. *Nat. Rev. Genet.* **14**, 1–2.
- 614 19. Sul JH, Martin LS, Eskin E. 2018 Population structure in genetic studies: Confounding  
615 factors and mixed models. *PLoS Genet.* **14**, e1007309.
- 616 20. Kang HM, Zaitlen NA, Wade CM, Kirby A, Heckerman D, Daly MJ, Eskin E. 2008  
617 Efficient control of population structure in model organism association mapping. *Genetics*  
618 **178**, 1709–1723.
- 619 21. Segura V, Vilhjálmsson BJ, Platt A, Korte A, Seren Ü, Long Q, Nordborg M. 2012 An  
620 efficient multi-locus mixed-model approach for genome-wide association studies in  
621 structured populations. *Nat. Genet.* **44**, 825–830.
- 622 22. Atwell S *et al.* 2010 Genome-wide association study of 107 phenotypes in *Arabidopsis*  
623 *thaliana* inbred lines. *Nature* **465**, 627–631.
- 624 23. Liu X, Huang M, Fan B, Buckler ES, Zhang Z. 2016 Iterative usage of fixed and random  
625 effect models for powerful and efficient genome-wide association studies. *PLoS Genet.* **12**,  
626 e1005767.
- 627 24. Lopez-Arboleda WA, Reinert S, Nordborg M, Korte A. 2021 Global genetic heterogeneity  
628 in adaptive traits. *bioRxiv*
- 629 25. Lander ES, Schork NJ. 1994 Genetic dissection of complex traits. *Science* **265**, 2037–2048.
- 630 26. Biddanda A, Rice DP, Novembre J. 2020 A variant-centric perspective on geographic  
631 patterns of human allele frequency variation. *Elife* **9**. (doi:10.7554/eLife.60107)
- 632 27. Monroe JG, McKay JK, Weigel D, Flood PJ. 2021 The population genomics of adaptive  
633 loss of function. *Heredity* **126**, 383–395.
- 634 28. Eaves LJ. 1994 Effect of genetic architecture on the power of human linkage studies to  
635 resolve the contribution of quantitative trait loci. *Heredity* **72 ( Pt 2)**, 175–192.
- 636 29. Platt A, Vilhjálmsson BJ, Nordborg M. 2010 Conditions under which genome-wide  
637 association studies will be positively misleading. *Genetics* **186**, 1045–1052.
- 638 30. Jensen LM, Halkier BA, Burow M. 2014 How to discover a metabolic pathway? An update  
639 on gene identification in aliphatic glucosinolate biosynthesis, regulation and transport. *Biol.*  
640 *Chem.* **395**, 529–543.
- 641 31. Harun S, Abdullah-Zawawi M-R, Goh H-H, Mohamed-Hussein Z-A. 2020 A  
642 comprehensive gene inventory for glucosinolate biosynthetic pathway in *Arabidopsis*  
643 *thaliana*. *J. Agric. Food Chem.* **68**, 7281–7297.

- 644 32. Brachi B, Meyer CG, Villoutreix R, Platt A, Morton TC, Roux F, Bergelson J. 2015  
645 Coselected genes determine adaptive variation in herbivore resistance throughout the native  
646 range of *Arabidopsis thaliana*. *Proc. Natl. Acad. Sci. U. S. A.* **112**, 4032–4037.
- 647 33. Kliebenstein DJ. 2009 A quantitative genetics and ecological model system: understanding  
648 the aliphatic glucosinolate biosynthetic network via QTLs. *Phytochem. Rev.* **8**, 243–254.
- 649 34. Chan EKF, Rowe HC, Kliebenstein DJ. 2010 Understanding the evolution of defense  
650 metabolites in *Arabidopsis thaliana* using genome-wide association mapping. *Genetics* **185**,  
651 991–1007.
- 652 35. Kerwin R *et al.* 2015 Natural genetic variation in *Arabidopsis thaliana* defense metabolism  
653 genes modulates field fitness. *Elife* **4**. (doi:10.7554/eLife.05604)
- 654 36. Rowe HC, Hansen BG, Halkier BA, Kliebenstein DJ. 2008 Biochemical networks and  
655 epistasis shape the *Arabidopsis thaliana* metabolome. *Plant Cell* **20**, 1199–1216.
- 656 37. Frachon L *et al.* 2017 Intermediate degrees of synergistic pleiotropy drive adaptive  
657 evolution in ecological time. *Nat Ecol Evol* **1**, 1551–1561.
- 658 38. Aoun N, Desaint H, Boyrie L, Bonhomme M, Deslandes L, Berthomé R, Roux F. 2020 A  
659 complex network of additive and epistatic quantitative trait loci underlies natural variation  
660 of *Arabidopsis thaliana* quantitative disease resistance to *Ralstonia solanacearum* under  
661 heat stress. *Molecular Plant Pathology*. **21**, 1405–1420. (doi:10.1111/mpp.12964)
- 662 39. Doheny-Adams T, Redeker K, Kittipol V, Bancroft I, Hartley SE. 2017 Development of an  
663 efficient glucosinolate extraction method. *Plant Methods* **13**, 17.
- 664 40. Humphrey PT, Gloss AD, Frazier J, Nelson-Dittrich AC, Faries S, Whiteman NK. 2018  
665 Heritable plant phenotypes track light and herbivory levels at fine spatial scales. *Oecologia*  
666 **187**, 427–445.
- 667 41. Gatto L, Gibb S, Rainer J. 2021 MSnbase, Efficient and elegant R-based processing and  
668 visualization of raw mass spectrometry data. *J. Proteome Res.* **20**, 1063–1069.
- 669 42. Smith CA, Want EJ, O’Maille G, Abagyan R, Siuzdak G. 2006 XCMS: processing mass  
670 spectrometry data for metabolite profiling using nonlinear peak alignment, matching, and  
671 identification. *Anal. Chem.* **78**, 779–787.
- 672 43. Arouisse B, Korte A, van Eeuwijk F, Kruijer W. 2020 Imputation of 3 million SNPs in the  
673 *Arabidopsis* regional mapping population. *Plant J.* **102**, 872–882.
- 674 44. Bates D, Mächler M, Bolker B, Walker S. 2014 Fitting linear mixed-effects models using  
675 lme4. *arXiv [stat.CO]*.
- 676 45. Zhou X, Stephens M. 2012 Genome-wide efficient mixed-model analysis for association  
677 studies. *Nat. Genet.* **44**, 821–824.
- 678 46. Zhou X, Stephens M. 2014 Efficient multivariate linear mixed model algorithms for  
679 genome-wide association studies. *Nat. Methods* **11**, 407–409.

- 680 47. Li J, Hansen BG, Ober JA, Kliebenstein DJ, Halkier BA. 2008 Subclade of flavin-  
681 monooxygenases involved in aliphatic glucosinolate biosynthesis. *Plant Physiol.* **148**,  
682 1721–1733.
- 683 48. Hansen BG, Kliebenstein DJ, Halkier BA. 2007 Identification of a flavin-monooxygenase  
684 as the S-oxygenating enzyme in aliphatic glucosinolate biosynthesis in *Arabidopsis*. *Plant J.*  
685 **50**, 902–910.
- 686 49. Textor S, de Kraker J-W, Hause B, Gershenzon J, Tokuhisa JG. 2007 MAM3 catalyzes the  
687 formation of all aliphatic glucosinolate chain lengths in *Arabidopsis*. *Plant Physiol.* **144**,  
688 60–71.
- 689 50. Chen S *et al.* 2003 CYP79F1 and CYP79F2 have distinct functions in the biosynthesis of  
690 aliphatic glucosinolates in *Arabidopsis*. *Plant J.* **33**, 923–937.
- 691 51. Sharma M, Mukhopadhyay A, Gupta V, Pental D, Pradhan AK. 2016 BjuB.CYP79F1  
692 regulates synthesis of propyl fraction of aliphatic glucosinolates in oilseed mustard *Brassica*  
693 *juncea*: Functional validation through genetic and transgenic approaches. *PLoS One* **11**,  
694 e0150060.
- 695 52. Prasad KVS *et al.* 2012 A gain-of-function polymorphism controlling complex traits and  
696 fitness in nature. *Science* **337**, 1081–1084.
- 697 53. Kliebenstein DJ, Lambrix VM, Reichelt M, Gershenzon J, Mitchell-Olds T. 2001 Gene  
698 duplication in the diversification of secondary metabolism: Tandem 2-oxoglutarate-  
699 dependent dioxygenases control glucosinolate biosynthesis in *Arabidopsis*. *Plant Cell* **13**,  
700 681–693.
- 701 54. Hansen BG, Kerwin RE, Ober JA, Lambrix VM, Mitchell-Olds T, Gershenzon J, Halkier  
702 BA, Kliebenstein DJ. 2008 A novel 2-oxoacid-dependent dioxygenase involved in the  
703 formation of the goiterogenic 2-hydroxybut-3-enyl glucosinolate and generalist insect  
704 resistance in *Arabidopsis*. *Plant Physiology.* **148**, 2096–2108. (doi:10.1104/pp.108.129981)
- 705 55. Pfalz M, Mikkelsen MD, Bednarek P, Olsen CE, Halkier BA, Kroymann J. 2011 Metabolic  
706 engineering in *Nicotiana benthamiana* reveals key enzyme functions in *Arabidopsis* indole  
707 glucosinolate modification. *Plant Cell* **23**, 716–729.
- 708 56. Pfalz M, Vogel H, Kroymann J. 2009 The gene controlling the indole glucosinolate  
709 modifier1 quantitative trait locus alters indole glucosinolate structures and aphid resistance  
710 in *Arabidopsis*. *Plant Cell* **21**, 985–999.
- 711 57. Pfalz M, Mukhaimar M, Perreau F, Kirk J, Hansen CIC, Olsen CE, Agerbirk N, Kroymann  
712 J. 2016 Methyl transfer in glucosinolate biosynthesis mediated by indole glucosinolate o-  
713 methyltransferase 5. *Plant Physiol.* **172**, 2190–2203.
- 714 58. Mathieson I, McVean G. 2012 Differential confounding of rare and common variants in  
715 spatially structured populations. *Nat. Genet.* **44**, 243–246.
- 716 59. Kittipol V, He Z, Wang L, Doheny-Adams T, Langer S, Bancroft I. 2019 Genetic  
717 architecture of glucosinolate variation in *Brassica napus*. *J. Plant Physiol.* **240**, 152988.

- 718 60. Liu S, Huang H, Yi X, Zhang Y, Yang Q, Zhang C, Fan C, Zhou Y. 2020 Dissection of  
719 genetic architecture for glucosinolate accumulations in leaves and seeds of *Brassica napus*  
720 by genome-wide association study. *Plant Biotechnol. J.* **18**, 1472–1484.
- 721 61. Wei D, Cui Y, Mei J, Qian L, Lu K, Wang Z-M, Li J, Tang Q, Qian W. 2019 Genome-wide  
722 identification of loci affecting seed glucosinolate contents in *Brassica napus* L. *J. Integr.*  
723 *Plant Biol.* **61**, 611–623.
- 724 62. Lu K *et al.* 2019 Whole-genome resequencing reveals *Brassica napus* origin and genetic  
725 loci involved in its improvement. *Nat. Commun.* **10**, 1154.
- 726 63. Ritchie MD, Van Steen K. 2018 The search for gene-gene interactions in genome-wide  
727 association studies: challenges in abundance of methods, practical considerations, and  
728 biological interpretation. *Annals of Translational Medicine.* **6**, 157–157.  
729 (doi:10.21037/atm.2018.04.05)
- 730 64. Crawford L, Zeng P, Mukherjee S, Zhou X. 2017 Detecting epistasis with the marginal  
731 epistasis test in genetic mapping studies of quantitative traits. *PLoS Genet.* **13**, e1006869.
- 732 65. Barboza L, Effgen S, Alonso-Blanco C, Kooke R, Keurentjes JJB, Koornneef M, Alcázar R.  
733 2013 Arabidopsis semidwarfs evolved from independent mutations in GA20ox1, ortholog  
734 to green revolution dwarf alleles in rice and barley. *Proc. Natl. Acad. Sci. U. S. A.* **110**,  
735 15818–15823.
- 736
